# Supplementary material for: Managing the Versions of a Software Product Under Variable and Endogenous Demand
Source: Atypon-hosted journal article supplement (doi:10.1287/isre.1090.0275), 2010-01-28
Supplement: isre.1090.0275-sm-ec.pdf [file isre.1090.0275-sm-ec.pdf]

## Electronic Companion

# Managing the Versions of a Software Product under Variable and Endogenous Demand

Kutsal Dogan<sup>+</sup> • Yonghua Ji<sup>\*</sup> • Vijay S. Mookerjee<sup>+</sup> • Suresh Radhakrishnan<sup>+</sup>

<sup>+</sup>*University of Texas at Dallas, School of Management,  
Richardson, TX 75080, USA*

<sup>\*</sup>*University of Alberta, School of Business,  
Edmonton, Alberta T6G 2R6, Canada*  
*kutsal.dogan@utdallas.edu, yji@ualberta.ca, {vijaym, sradhakr}@utdallas.edu*

**Table EC1: Glossary of Notation**

| Variable/ Parameter | Description                                                                               |
|---------------------|-------------------------------------------------------------------------------------------|
| $i$                 | Period, $i \in \{1, 2\}$                                                                  |
| $q_i$               | Initial features when $i=1$ and additional features, i.e., upgrades when $i=2$            |
| $y$                 | Design effort                                                                             |
| $x_i$               | First-period and second-period demand for $i=1,2$ , respectively                          |
| $b_1$               | Marginal cost of developing additional product features                                   |
| $b_2$               | Cost of integrating multiple features                                                     |
| $a$                 | Marginal cost of including additional design effort                                       |
| $K_i$               | First- and second-period fixed software development cost for $i=1,2$ , respectively       |
| $C_i$               | First- and second-period total software development cost for $i=1,2$ , respectively       |
| $P_i$               | Price of the first- and second-period product for $i=1,2$ , respectively                  |
| $P_u$               | Price to upgrade to the second-period product for first-period customers                  |
| $\theta$            | Customer marginal utility for product features                                            |
| $c$                 | Customer set-up and learning cost for a new product                                       |
| $c_u$               | Customer set-up and learning cost for an upgrade                                          |
| $c_0$               | Customer set-up and learning cost for an upgrade with no design effort                    |
| $u_i$               | Net utility of purchasing the first- and second-period product for $i=1,2$ , respectively |
| $u_{upgrade}$       | Net utility of purchasing the upgrade to the first-period customers                       |
| $\delta$            | Discount factor                                                                           |
| $\lambda$           | Word-of-mouth effect                                                                      |
| $\alpha$            | Herding parameter representing the influence of word-of-mouth effect on demand spread.    |
| $\bar{x}_2$         | Deterministic portion of the second-period demand                                         |
| $j$                 | Level of the second-period demand, $j = \text{High (H), Medium (M), Low (L)}$             |
| $\zeta$             | Demand spread parameter showing the deviation of second-period from the moderate level    |

|                 |                                                                                                                                                                                   |
|-----------------|-----------------------------------------------------------------------------------------------------------------------------------------------------------------------------------|
| $\Pr^j$         | Probability of event $j$                                                                                                                                                          |
| $p$             | Probability of medium demand                                                                                                                                                      |
| $\beta$         | Marginal benefit of design effort on fixed cost of software development                                                                                                           |
| $\gamma$        | Marginal benefit of design effort on customer set-up and learning costs                                                                                                           |
| $\pi_1$         | First-period profit                                                                                                                                                               |
| $\pi_{2NU}^j$   | Second-period profit without offering an upgrade for event $j$                                                                                                                    |
| $\Delta\pi_2^j$ | Incremental profit of offering an upgrade for event $j$                                                                                                                           |
| $\Omega$        | Software provider's upgrade strategy, $\Omega \equiv$ Never-upgrade (N), Upgrade if $x_i^H$ (H), Upgrade if $x_i^H$ or $x_i^M$ (MH), Upgrade if $x_i^H$ or $x_i^M$ or $x_i^L$ (A) |
| $z^\Omega$      | Indicator variable for software provider's strategy, $z^\Omega \in \{0, 1\}$                                                                                                      |

### Additional Notation

We introduce some additional notation using the parameters that are defined in Table EC1. We do this for making the equations compact. Define  $T^j = \theta[x_1 + \bar{x}_2 + D^j(\lambda\alpha + \zeta) - b_1 / \theta]$ ,  $R^1 = (1 + \delta)\theta x_1 - b_1$ ,  $R^j = [2T^j w] / 4b_2$ ,  $w = \lambda\theta - 2b_2$ ,  $F^j = [(T^j)^2 / 4b_2] - (c_0 x_1 + K_2)$ ,  $S = w^2 / 4b_2$ ,  $F^1 = cx_1 + K_1$ ,  $S^{NU} = \theta\lambda$ ,  $R^{NU} = \theta\bar{x}_2 - c\lambda$ ,  $F^{NU} = c\bar{x}_2$ ,  $G = c_0\gamma x_1 + K_2\beta$ ,  $X_1 = b_2 - \delta S^{NU} - \delta \Pr^H S - \delta \Pr^M S$ ,  $Y_1 = R^1 + \delta R^{NU} + \delta \Pr^H R^H + \delta \Pr^M R^M$ ,  $X_2 = b_2 - \delta S^{NU} - \delta \Pr^H S$ ,  $Y_2 = R^1 + \delta R^{NU} + \delta \Pr^H R^H$ ,  $X_3 = b_2 - \delta S^{NU}$ ,  $Y_3 = R^1 + \delta R^{NU}$

### Expressions of $q_2^{j*}$ , $\Delta\pi_2^{j*}$ , $q_1^{\Omega*}$ and $y^{\Omega*}$

Rearranging equation (4), we solve for  $q_2^{j*}$  to be:

$$q_2^{j*} = [T^j + wq_1] / 2b_2 \quad (\text{A.1})$$

Substituting (A.1) in equation (3) we get:

$$\Delta\pi_2^{j*} = R^j q_1 + S q_1^2 + G y + F^j \quad (\text{A.2})$$

where  $T^j$ ,  $w$ ,  $R^j$ ,  $S$ ,  $G$ , and  $F^j$  are defined in the Additional Notation section above.

From Equation (5), we obtain the following first-order equations for  $q_1^{\Omega*}$  and  $y^{\Omega*}$ :

$$\begin{aligned} \partial\pi / \partial q_1 &= R^1 - 2b_2 q_1 + \delta[R^{NU} + 2S^{NU} q_1] + \delta \Pr^H [R^H + 2S q_1](z^H + z^{MH} + z^A) \\ &\quad + \delta \Pr^M [R^M + 2S q_1](z^{MH} + z^A) + \delta \Pr^L [R^L + 2S q_1] z^A = 0 \end{aligned}$$

$$\partial\pi / \partial y = -2ay + \delta G[\Pr^H(z^H + z^{MH} + z^A) + \Pr^M(z^{MH} + z^A) + \Pr^L z^A] = 0$$

Solving the above first-order conditions provides the following optimum solutions:

$$q_1^{\Omega*} = \frac{R^1 + \delta R^{NU} + \delta \Pr^H R^H (z^H + z^{MH} + z^A) + \delta \Pr^M R^M (z^{MH} + z^A) + \delta \Pr^L R^L z^A}{2(b_2 - \delta S^{NU} - \delta \Pr^H S (z^H + z^{MH} + z^A) - \delta \Pr^M S (z^{MH} + z^A) - \delta \Pr^L S z^A)} \quad (\text{A.3})$$

$$y^{\Omega*} = \frac{\delta G(\Pr^H (z^H + z^{MH} + z^A) + \Pr^M (z^{MH} + z^A) + \Pr^L z^A)}{2a} \quad (\text{A.4})$$

### Proof of Proposition 1

From Equation (A.1), we get  $q_2^{j*} = \frac{T^j + (\lambda\theta - 2b_2)q_1}{2b_2}$ . Then,  $\frac{\partial q_2^{j*}}{\partial q_1} = \frac{(\lambda\theta - 2b_2)}{2b_2}$ . Clearly  $\frac{\partial q_2^{j*}}{\partial q_1}$  is negative when  $\lambda < \frac{2b_2}{\theta}$  and positive otherwise. QED

### Proof of Proposition 2

For the second order conditions, we require that  $X_i > 0$  ( $i = 1, 2, 3$ ) and  $X_1 - \delta \text{Pr}^L S > 0$ . Then from

Equation (A.3), we can write  $q_1^{A*} = \frac{Y_1 + \delta \text{Pr}^L R^L}{2(X_1 - \delta \text{Pr}^L S)}$ ,  $q_1^{MH*} = \frac{Y_1}{2X_1}$ ,  $q_1^{H*} = \frac{Y_2}{2X_2}$  and  $q_1^{N*} = \frac{Y_3}{2X_3}$ .

Since  $q_1^{\Omega*}$  is positive, we further have  $Y_i > 0$  ( $i = 1, 2, 3$ ) and  $Y_1 + \delta \text{Pr}^L R^L > 0$ .

We present each part of the proposition as follows.

**Part 1:** When  $z^N = 1$ , the second order condition is  $\frac{\partial^2 \pi}{\partial q_1^2} = 2(\delta S^{NU} - b_2) = 2(\delta\lambda\theta - b_2) > 0$ , if  $\lambda > \frac{b_2}{\delta\theta}$ .

Also,  $\pi_1(q_1^{\max}) > 0$  and  $\pi_1(q_1 = 0) < 0$ , thus,  $q_1^{N*} = q_1^{\max}$ . Following a similar track, we can show that  $q_1^{A*} = q_1^{MH*} = q_1^{H*} = q_1^{\max}$ . This establishes Proposition 1.1.

**Part 2:** First we have  $q_1^{A*} - q_1^{MH*} = \frac{\delta \text{Pr}^L S}{2(X_1 - \delta \text{Pr}^L S)} \left[ \frac{R^L}{S} + \frac{Y_1}{X_1} \right]$  by using the above expressions of  $q_1^{A*}$

and  $q_1^{MH*}$ . Since  $\frac{\delta \text{Pr}^L S}{2(X_1 - \delta \text{Pr}^L S)} > 0$ , we need to show that  $\frac{R^L}{S} + \frac{Y_1}{X_1} > 0$ . Plugging in values of  $R^L$

and  $S$ , the last term is equal to  $\frac{R^L}{S} + \frac{Y_1}{X_1} = \frac{2T^L}{w} + \frac{Y_1}{X_1}$ . We have  $\frac{Y_1}{X_1} > 0$  and  $w > 0$  since  $\frac{2b_2}{\theta} < \lambda$ . If

$T^L > 0$ , then  $\frac{2T^L}{w} + \frac{Y_1}{X_1} > 0$ , and thus  $q_1^{A*} - q_1^{MH*} > 0$ . If  $T^L < 0$ ,  $\frac{2T^L}{w} + \frac{Y_1}{X_1} = \frac{2(T^L + wq_1^{MH*})}{w}$  since

$q_1^{MH*} = \frac{Y_1}{2X_1}$ . For any feasible solution of strategy  $A$ ,  $q_2^{L,A*} = \frac{T^L + wq_1^{A*}}{2b_2} > 0$ . Thus,  $T^L + wq_1^{A*} > 0$ .

Suppose  $q_1^{A*} < q_1^{MH*}$ . This implies  $T^L + wq_1^{A*} < T^L + wq_1^{MH*}$ , which means  $T^L + wq_1^{MH*} > 0$ . Then  $q_1^{A*} > q_1^{MH*}$ . This is a contradiction. Therefore, we should have  $q_1^{A*} > q_1^{MH*}$ .

Following a similar track, we show that  $q_1^{MH*} > q_1^{H*}$  and  $q_1^{H*} > q_1^{N*}$ . This establishes Proposition 1.2.

**Part 3:** We have  $q_1^{A*} - q_1^{MH*} = \frac{\delta \text{Pr}^L S}{2(X_1 - \delta \text{Pr}^L S)} \left[ \frac{R^L}{S} + \frac{Y_1}{X_1} \right]$ . Since  $\frac{\delta \text{Pr}^L S}{2(X_1 - \delta \text{Pr}^L S)} > 0$ , we need to

show that  $\frac{R^L}{S} + \frac{Y_1}{X_1} < 0$ . Plugging in values of  $R^L$  and  $S$ , the last term is equal to  $\frac{2T^L}{w} + \frac{Y_1}{X_1}$ . Note that

we have  $w < 0$  since  $\lambda < \frac{2b_2}{\theta}$ . We then follow the proof by contradiction track as in Part 2 above. This establishes Proposition 1.3. QED

### Proof of Proposition 3

Using Equation (A.4), we have the optimum values as  $y^{A^*} = \frac{\delta G}{2a}$ ,  $y^{MH^*} = \frac{\delta G(1+p)}{4a}$ ,  $y^{H^*} = \frac{\delta G(1-p)}{4a}$  and  $y^{N^*} = 0$ . As  $\frac{\delta G}{2a} > \frac{\delta G(1+p)}{4a} > \frac{\delta G(1-p)}{4a} > 0$  for all  $G, a > 0$  and  $p, \delta \in (0, 1)$ , it follows that  $y^{A^*} > y^{MH^*} > y^{H^*} > y^{N^*} = 0$ . QED

### Proof of Lemma 1

Noting that  $q_2^{L,A^*} = \frac{T^L + wq_1^{A^*}}{2b_2} = \frac{\theta[x_1 + \bar{x}_2 - (\lambda \cdot \alpha + \zeta) - b_1 / \theta] + (\theta\lambda - 2b_2)q_1^{A^*}}{2b_2} < 0$  and using assumption A1 the last inequality follows establishing the statement of Lemma 1. QED

### Proof of Lemma 2

Noting that  $\Delta\pi_2^{H,H^*} = R^H q_1^{NU} + S(q_1^{NU})^2 + F^H = \frac{(T^H + w \cdot q_1^{NU})^2}{4b_2} - (c_0 x_1 + K_2) > 0$  where the last inequality follows by assumption A2 establishing Lemma 2. QED

### Proof of Lemma 3

An interior solution  $y^*$  requires  $1 - \beta y^* > 0$  and  $1 - \gamma y^* > 0$ . The optimum values are

$y^{MH^*} = \frac{\delta G(1+p)}{4a}$  and  $y^{H^*} = \frac{\delta G(1-p)}{4a}$  for strategies **MH** and **H**. Substituting for  $G$  and using assumption A3, the statement of Lemma 3 is established. QED

### Proof of Proposition 4

Using Lemmas 1 and 2 the only feasible strategies are **MH** and **H**.

To prove the first part of Proposition 4, i.e.  $z^H = 1$ , we need to show that  $\pi^{H^*} > \pi^{MH^*}$ .

After substituting for  $y^{MH^*}$  and  $y^{H^*}$  and rearranging we have,

$$\pi^{MH^*} - \pi^{H^*} = \delta \Pr^M [R^M q_1^{MH^*} + S q_1^{MH^*2} + F^M + \frac{\delta G^2}{4a}] - (b_2 - \delta S^{NU} - \delta \Pr^H S)(q_1^{MH^*} - q_1^{H^*})^2 \quad (\text{A.5})$$

Under the condition that the word-of-mouth effect is low or moderate,  $q_1^{MH^*}$  and  $q_1^{H^*}$  are interior according to Propositions 2.2 or 2.3. Plugging  $q_1^{MH^*}$  and  $q_1^{H^*}$  from Equation (A.3), we have

$$\pi^{MH^*} - \pi^{H^*} = \delta \Pr^M \left\{ \frac{(\delta\theta(1-p)S)^2}{16b_2 X_1 X_2} [\zeta + f^\Delta]^2 + \frac{\delta G^2}{4a} - (c_0 x_1 + K_2) \right\}$$

where we define  $f^\Delta = \lambda\alpha + [8b_2(b_2 - \delta S^{NU})T^M + 4b_2 w(R^1 + \delta R^{NU})]/(\delta\theta(1-p)w^2)$ .

To assure the optimality of strategy **H**, we find the root of  $\zeta^*$  values where  $\pi^{MH^*} - \pi^{H^*} = 0$ . There is only one positive root  $\zeta^* = \sqrt{[16b_2X_1X_2((c_0x_1 + K_2) - \delta G^2/(4a))]/(\delta\theta(1-p)S)^2} - f^\Delta$  when the following inequality holds:  $\frac{(\delta\theta(1-p)S)^2}{16b_2X_1X_2} [f^\Delta]^2 + \frac{\delta G^2}{4a} - (c_0x_1 + K_2) < 0$ ; It is equivalent to say that  $a$  is sufficiently

high:  $a > a^* = \frac{\delta G^2}{4} \left[ (c_0x_1 + K_2) - \frac{(\delta\theta(1-p)S)^2}{16b_2X_1X_2} (f^\Delta)^2 \right]^{-1}$ . Then,  $\pi^{H^*} > \pi^{MH^*}$  when  $\zeta > \zeta^*$  and  $a > a^*$ .

To prove the second part of the proposition, i.e.  $z^{MH} = 1$ , we need to show  $\Delta\pi_2^{H,MH^*} > \Delta\pi_2^{M,MH^*} > 0$  and  $\pi^{MH^*} > \pi^{H^*}$ . First, we have  $\pi^{MH^*} > \pi^{H^*}$  when  $\zeta < \zeta^*$ . We next check the feasibility constraint:

$\Delta\pi_2^{H,MH^*} > \Delta\pi_2^{M,MH^*} > 0$ . Using the condition  $\pi^{MH^*} > \pi^{H^*}$ , we have

$$\delta \Pr^M [R^M q_1^{MH^*} + S q_1^{MH^*2} + F^M + \frac{\delta G^2}{4a}] - (b_2 - \delta S^{NU} - \delta \Pr^H S)(q_1^{MH^*} - q_1^{H^*})^2 > 0.$$

Define the cutoff point  $\Delta^*$  as  $\Delta^* = R^M q_1^{MH^*} + S(q_1^{MH^*})^2 + F^M + \frac{\delta G^2}{4a}$ . Since

$X_2 = b_2 - \delta S^{NU} - \delta \Pr^H S > 0$  for the interior solution of strategy **H**, then  $\Delta^* > 0$ . Plugging the value of  $y^{MH^*}$ , we can have  $\Delta\pi_2^{M,MH^*} = R^M q_1^{MH^*} + S(q_1^{MH^*})^2 + F^M + \frac{\delta G^2(1+p)}{4a}$ . Then  $\Delta\pi_2^{M,MH^*} > \Delta^* > 0$ .

Also, we have  $\Delta\pi_2^{H,MH^*} > \Delta\pi_2^{M,MH^*}$  by definition. Thus the feasibility is established; therefore, strategy **MH** is the optimum. QED

### Proof of Proposition 5

When the word-of-mouth effect is high, Proposition 2.1 holds, i.e.,  $q_1^{H^*} = q_1^{MH^*} = q_1^{max}$ . Therefore

$$\pi^{MH^*} - \pi^{H^*} = \delta p (R^M q_1^{max} + S q_1^{max2} + F^M + \frac{\delta G^2}{4a})$$

using Equation A.5 given in proposition 4. It is easy to verify that  $\pi^{MH^*} - \pi^{H^*}$  is independent of  $\zeta$ . QED

### Proof of Corollary 1

The proof is embedded in the proof of proposition 5. It is easy to verify that the difference  $\pi^{MH^*} - \pi^{H^*}$  is strictly increasing in the word-of-mouth effect. Once the difference is positive, it does not become negative as  $\lambda$  increases. QED

### Proof of Proposition 6

When  $z^H = 1$ , we get  $y^{H^*} = \frac{\delta(c_0\gamma x_1 + K_2\beta)(1-p)}{4a}$  and  $\frac{\partial y^{H^*}}{\partial p} = -\frac{\delta(c_0\gamma x_1 + K_2\beta)}{4a} < 0$ . Also, when

$z^{MH} = 1$ , we have  $y^{MH^*} = \frac{\delta(c_0\gamma x_1 + K_2\beta)(1+p)}{4a}$  and  $\frac{\partial y^{MH^*}}{\partial p} = \frac{\delta(c_0\gamma x_1 + K_2\beta)}{4a} > 0$ . QED

### Results of the Model with the Word-of-Mouth Decreasing Demand Variability

In this section, we report a very brief sketch of the results of an alternative model in which high levels of word-of-mouth can possibly reduce demand variability. The impact of word-of-mouth on demand variance is modeled as  $\alpha\lambda(\bar{\lambda} - \lambda)$  instead of  $\alpha\lambda$ . In this new model, the expressions for the optimal values for the initial and upgrade features change. This change is solely due to the change in the expression of  $T^j$ . The new expression is:

$$T^j = \theta \left[ x_1 + \bar{x}_2 + D^j (\lambda(\bar{\lambda} - \lambda)\alpha + \zeta) - b_1 / \theta \right].$$

Thus, the rest of the expressions for the optimum values of decision variables and cutoff figures change accordingly. For example, the expression of  $\zeta^*$  remains the same although  $f^\Delta$  is now given by

$$f^\Delta = \lambda(\bar{\lambda} - \lambda)\alpha + \left[ 8b_2(b_2 - \delta S^{NU})T^M + 4b_2w(R^1 + \delta R^{NU}) \right] / (\delta\theta(1-p)w^2).$$
